# Supplementary figures and images for: Microbiome of the Lower Genital Tract in Chinese Women with Endometriosis by 16s rRNA Sequencing Technique: A Pilot Study
Source: Preprints.org preprint supplement (doi:10.20944/preprints201911.0147.v1), 2019-11-13

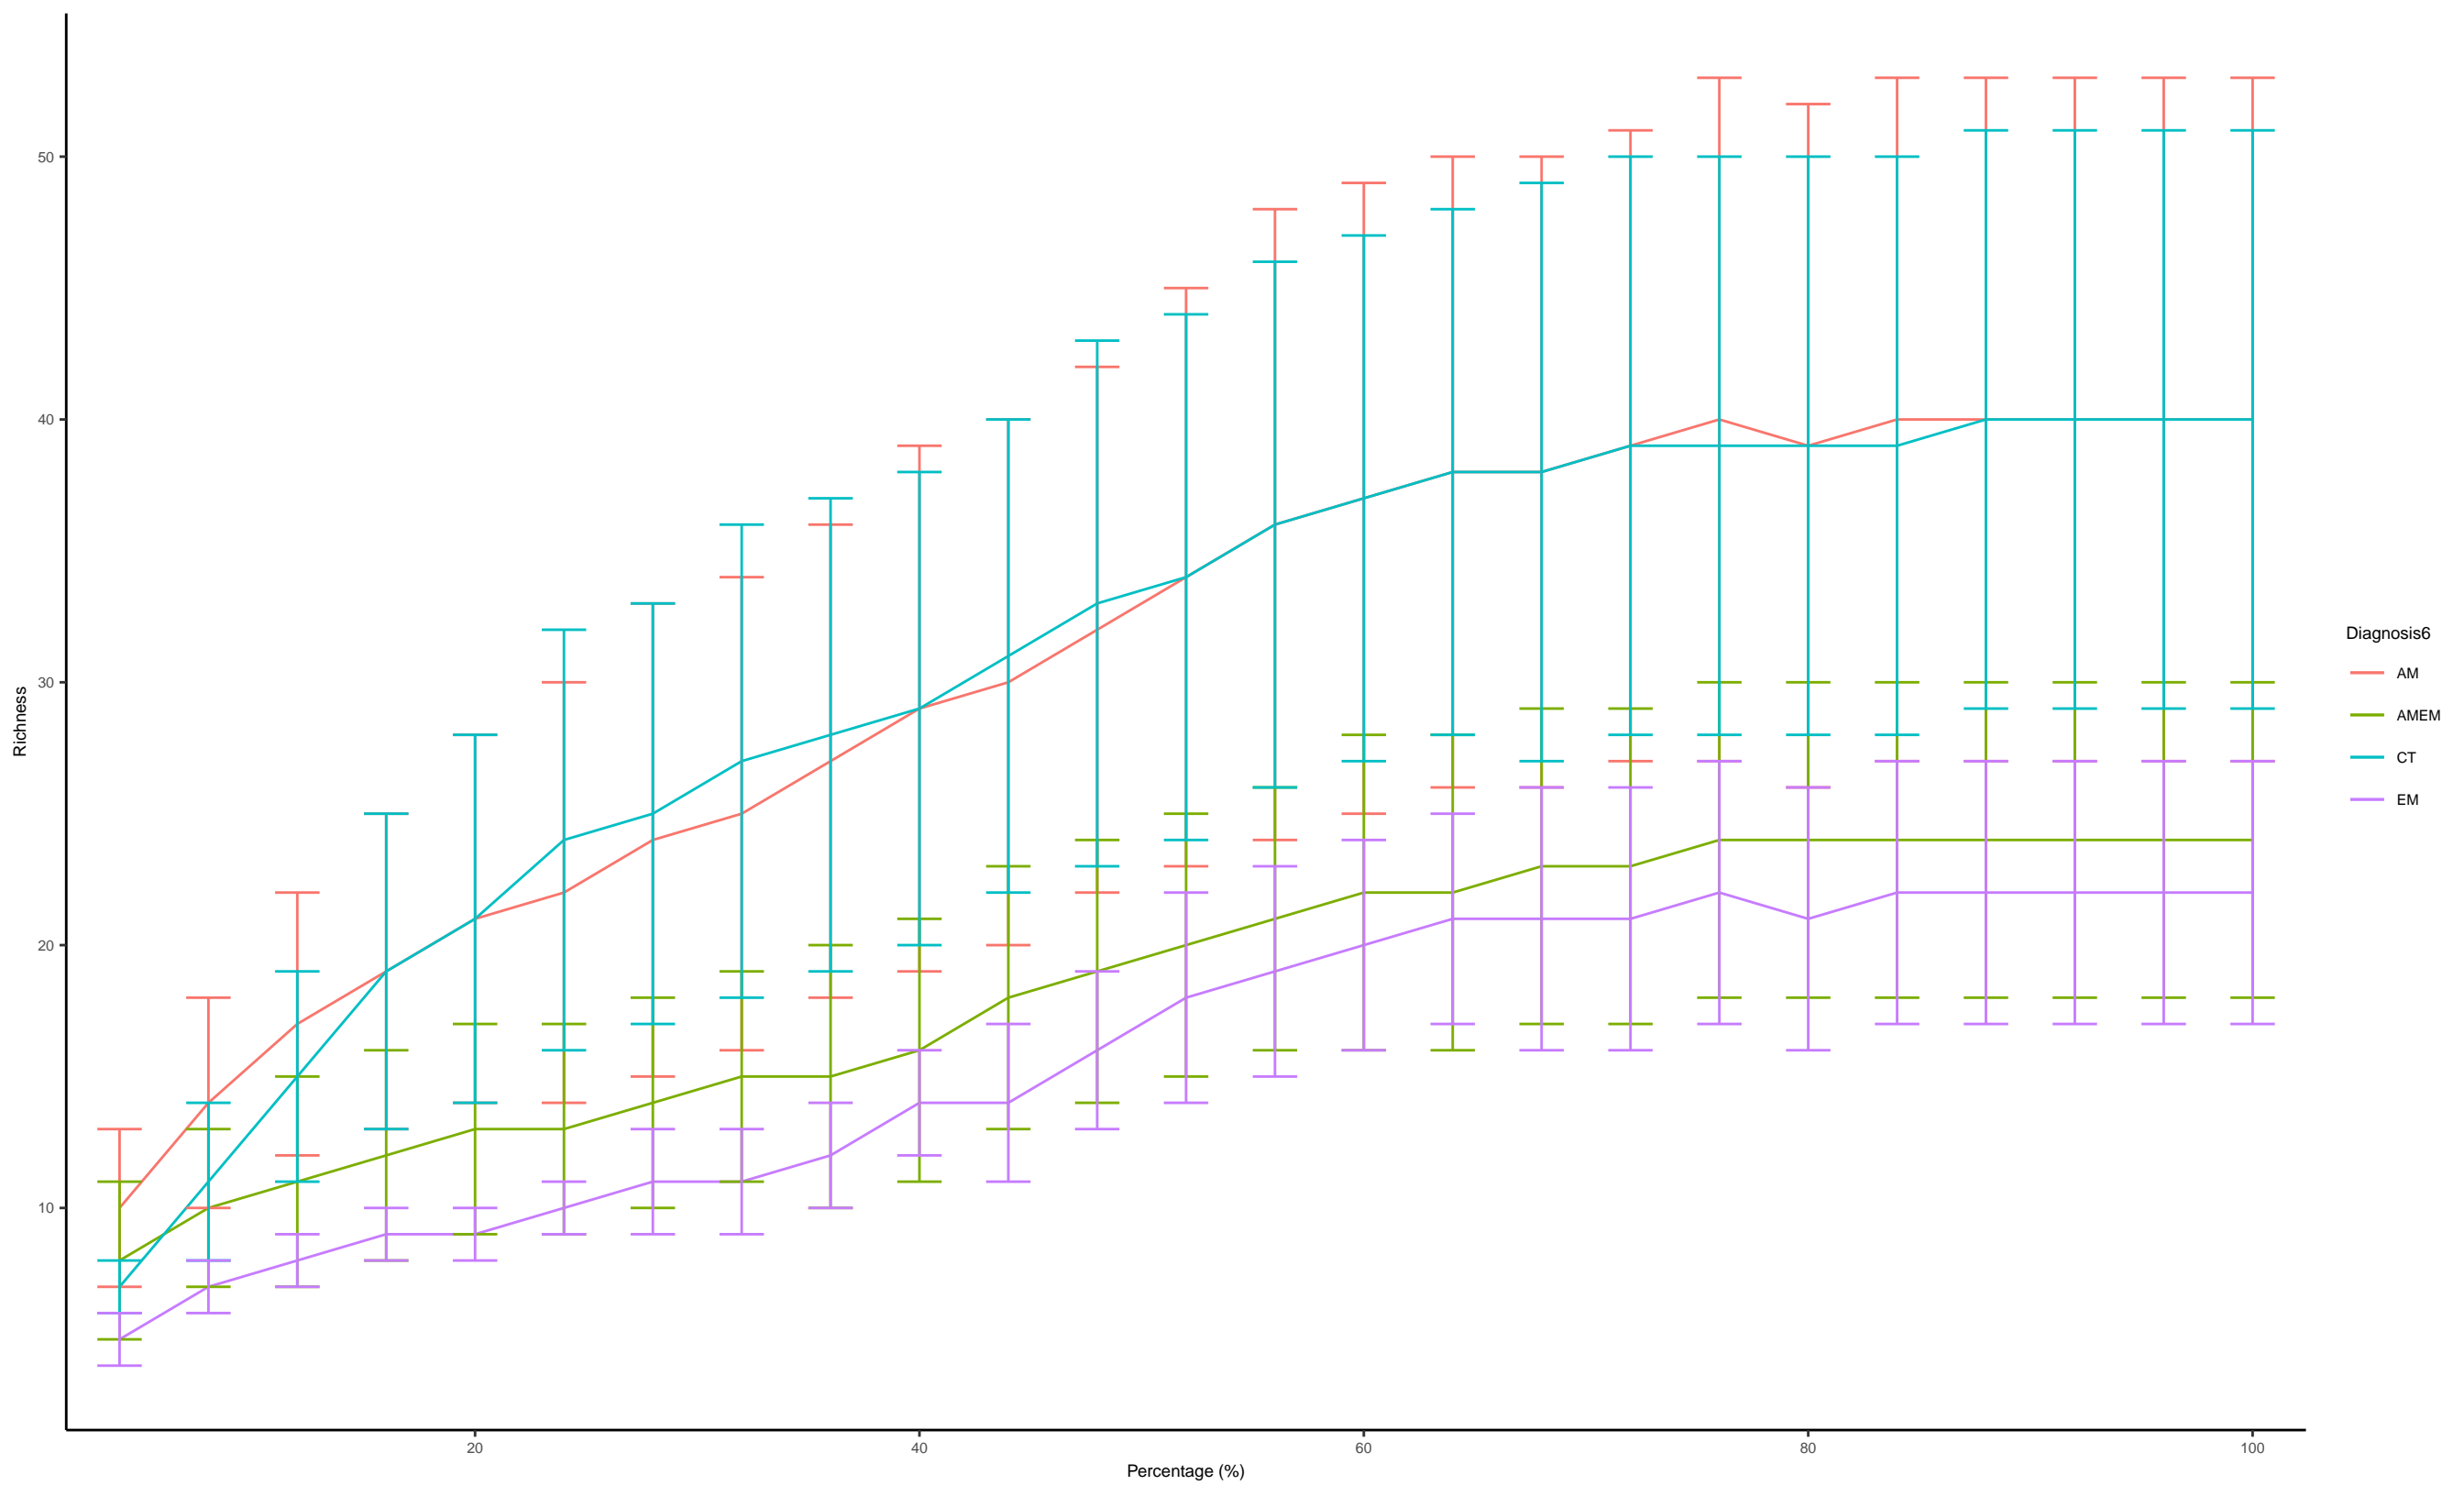

Supplement: Supplementary file 3 [file supplementary]

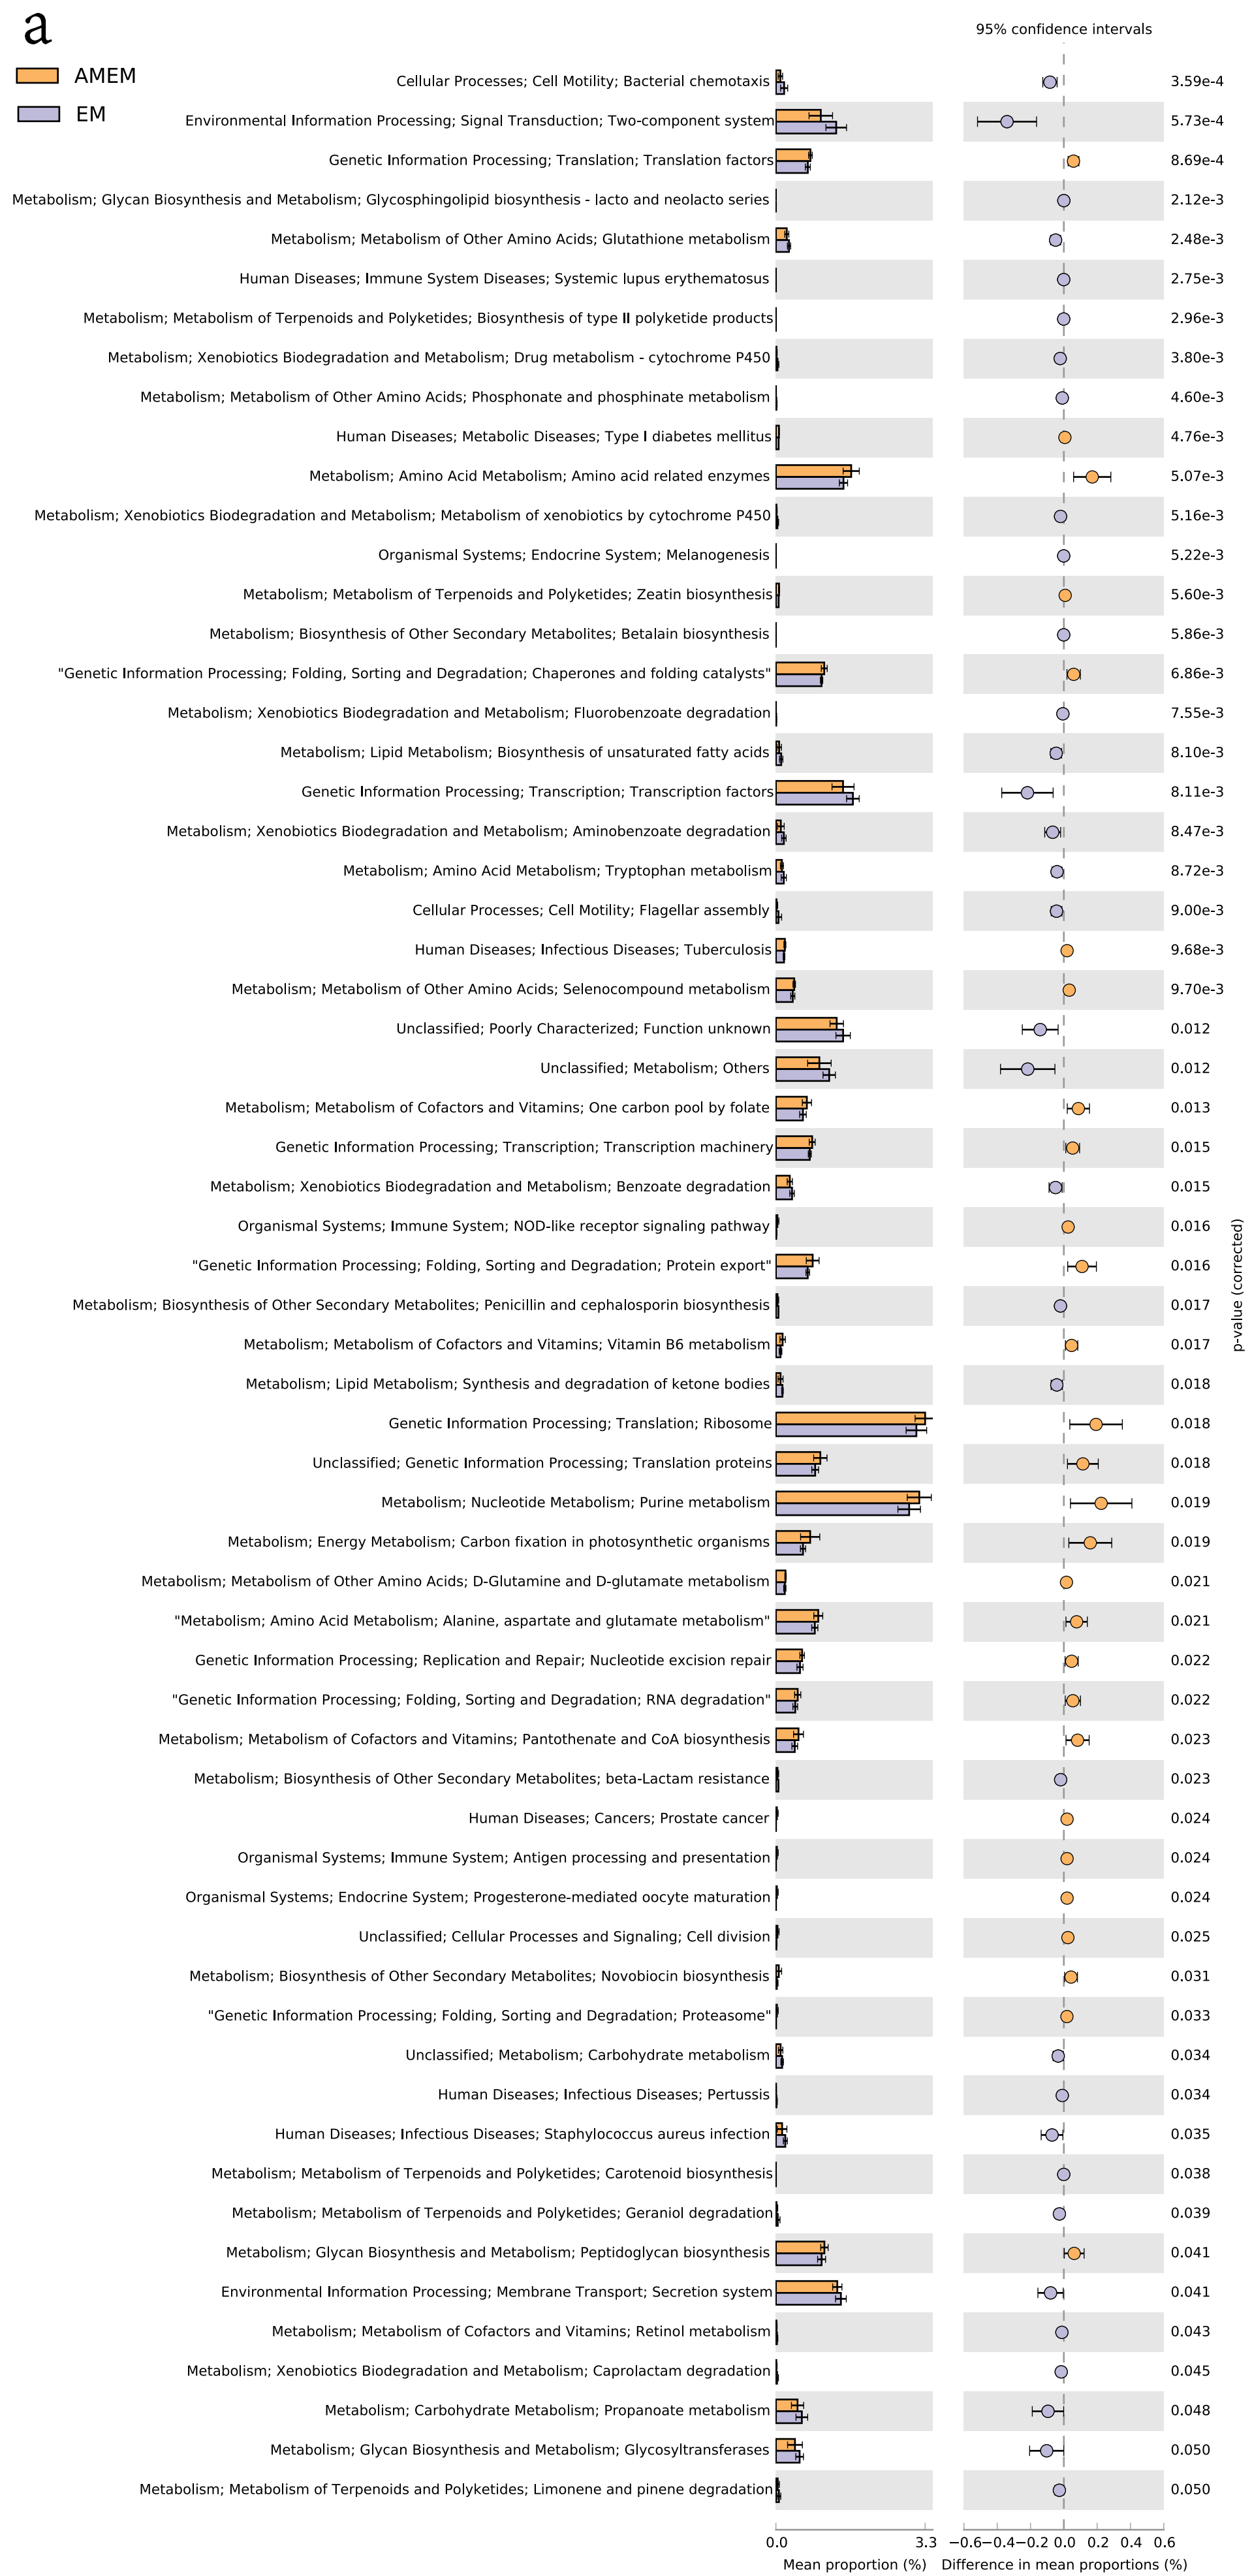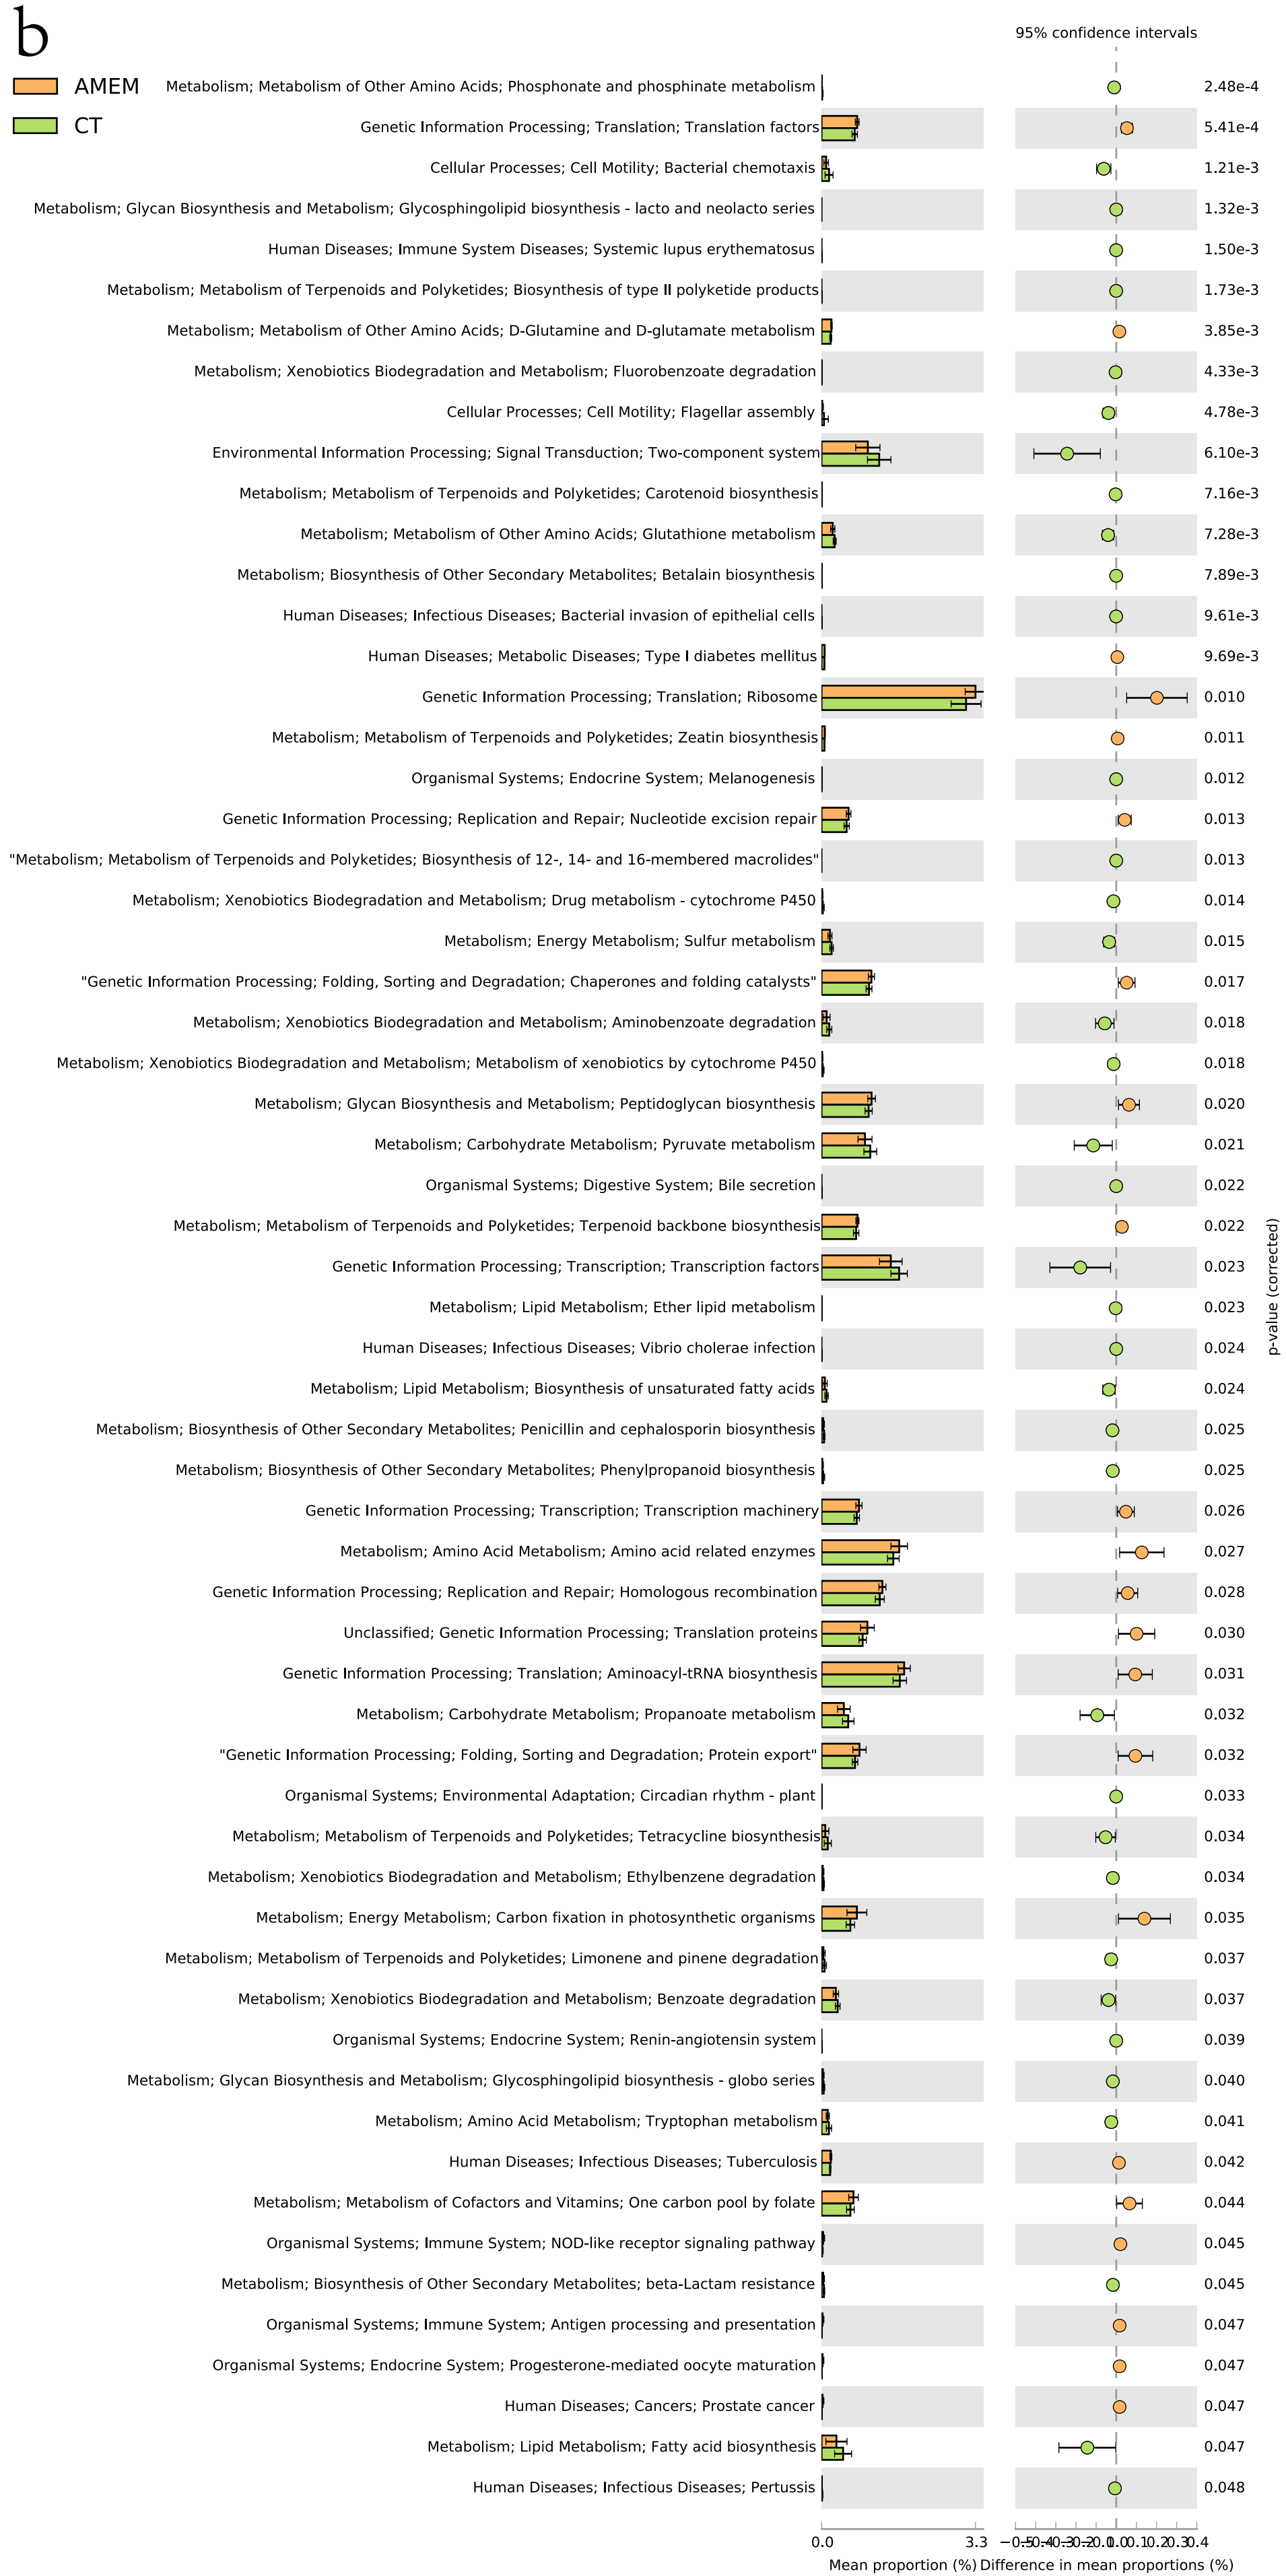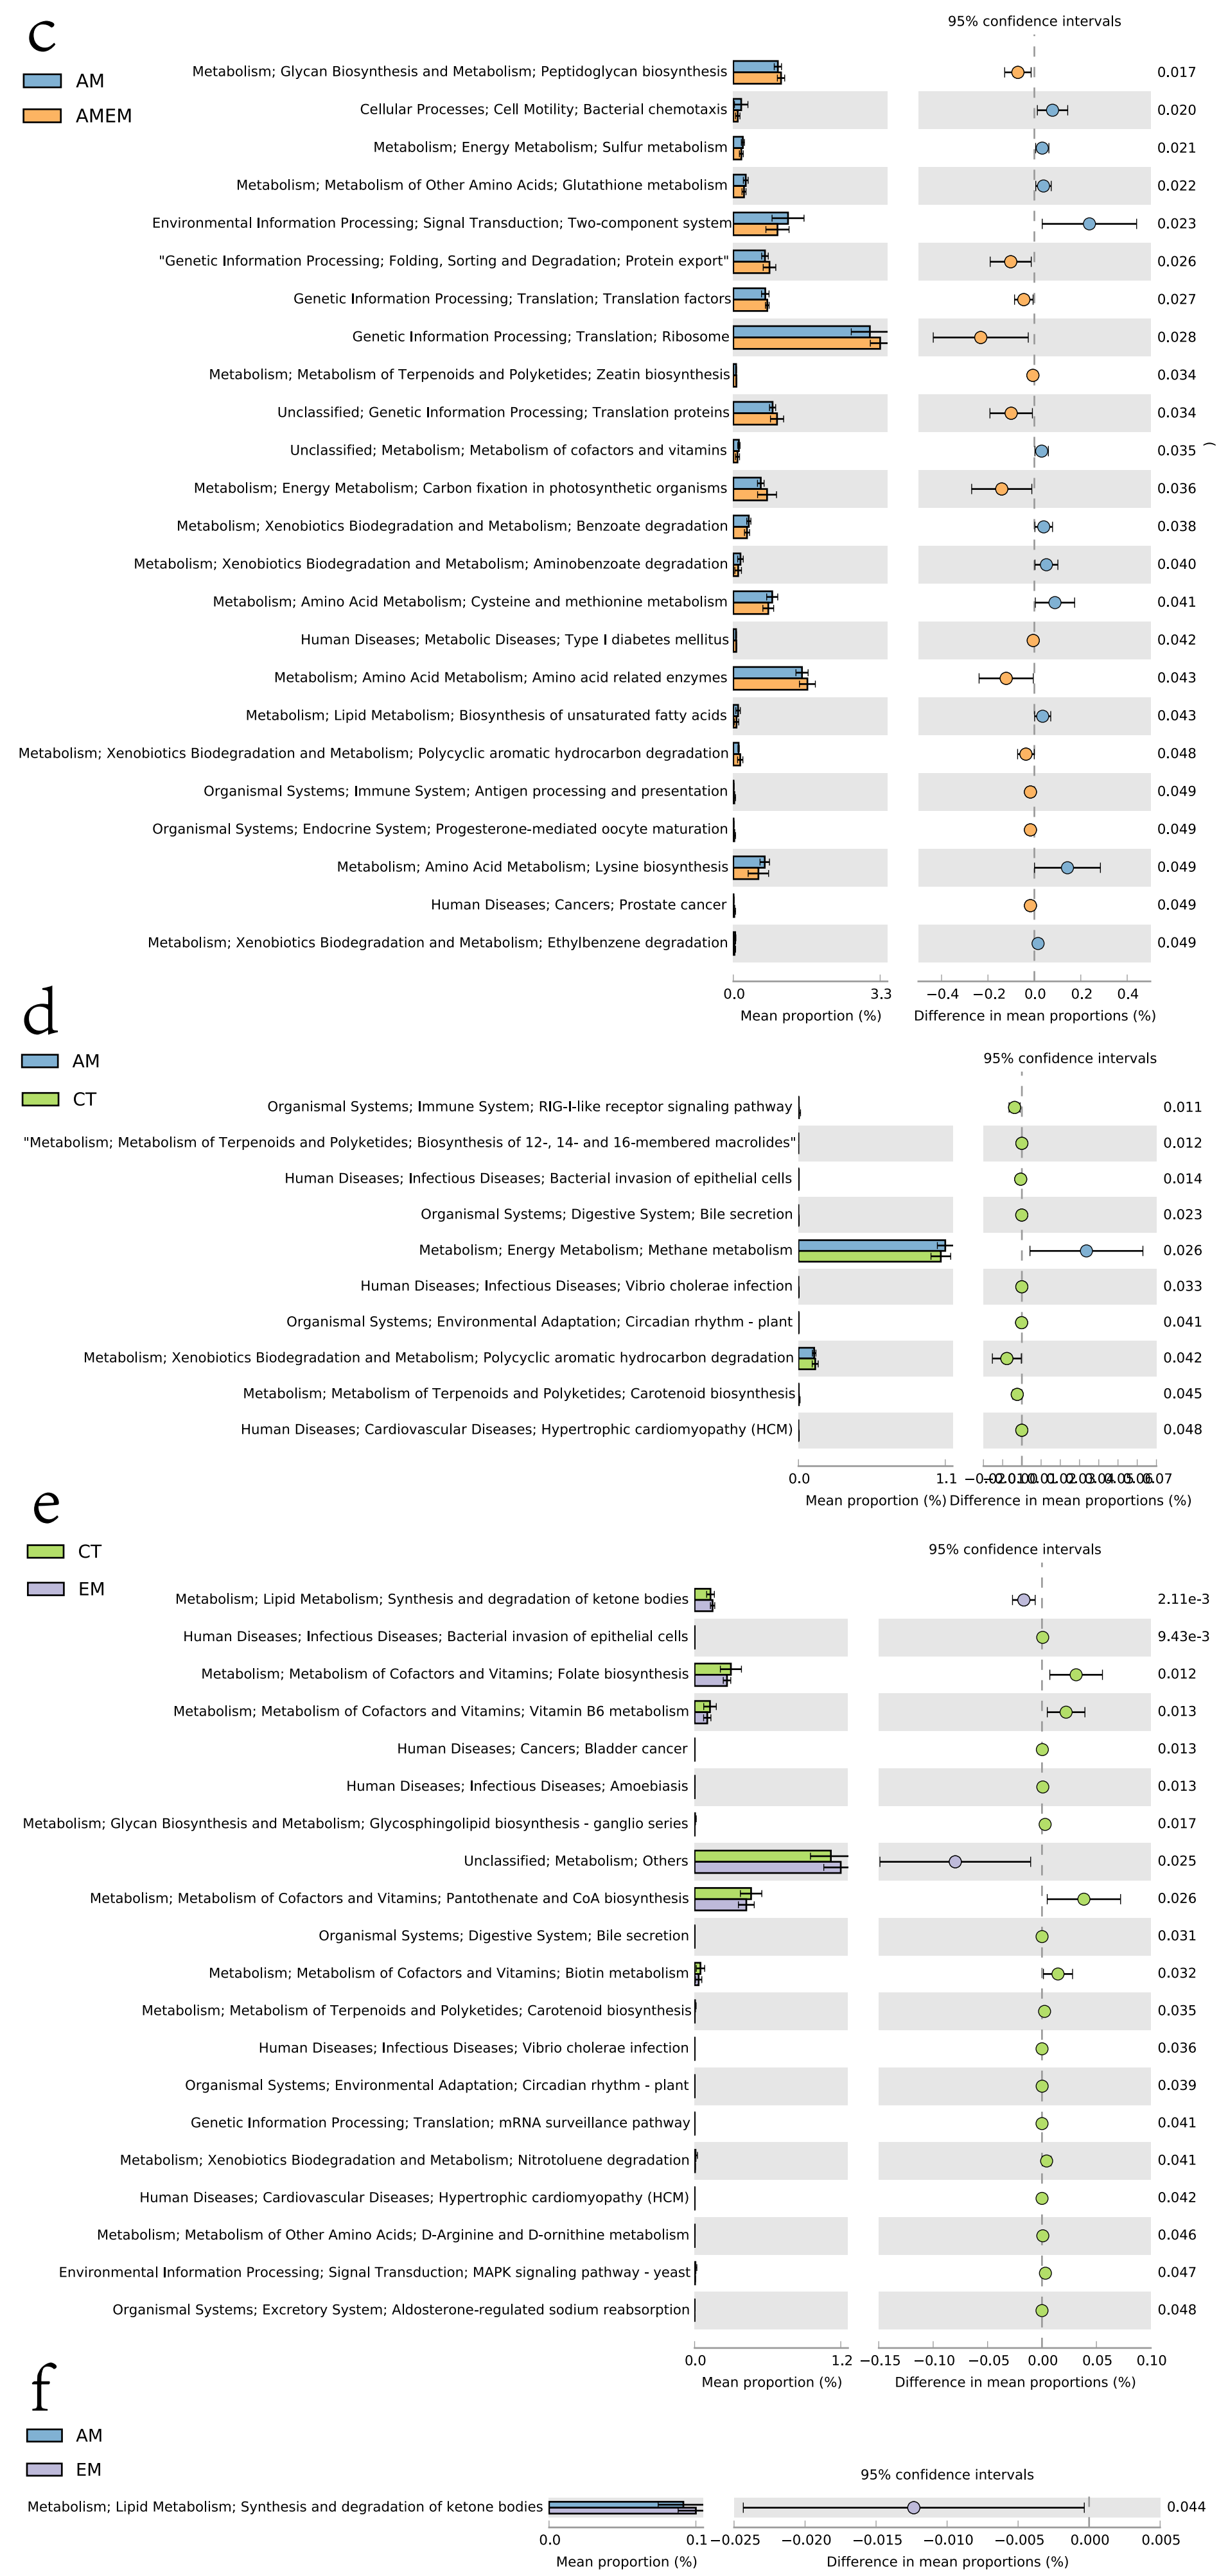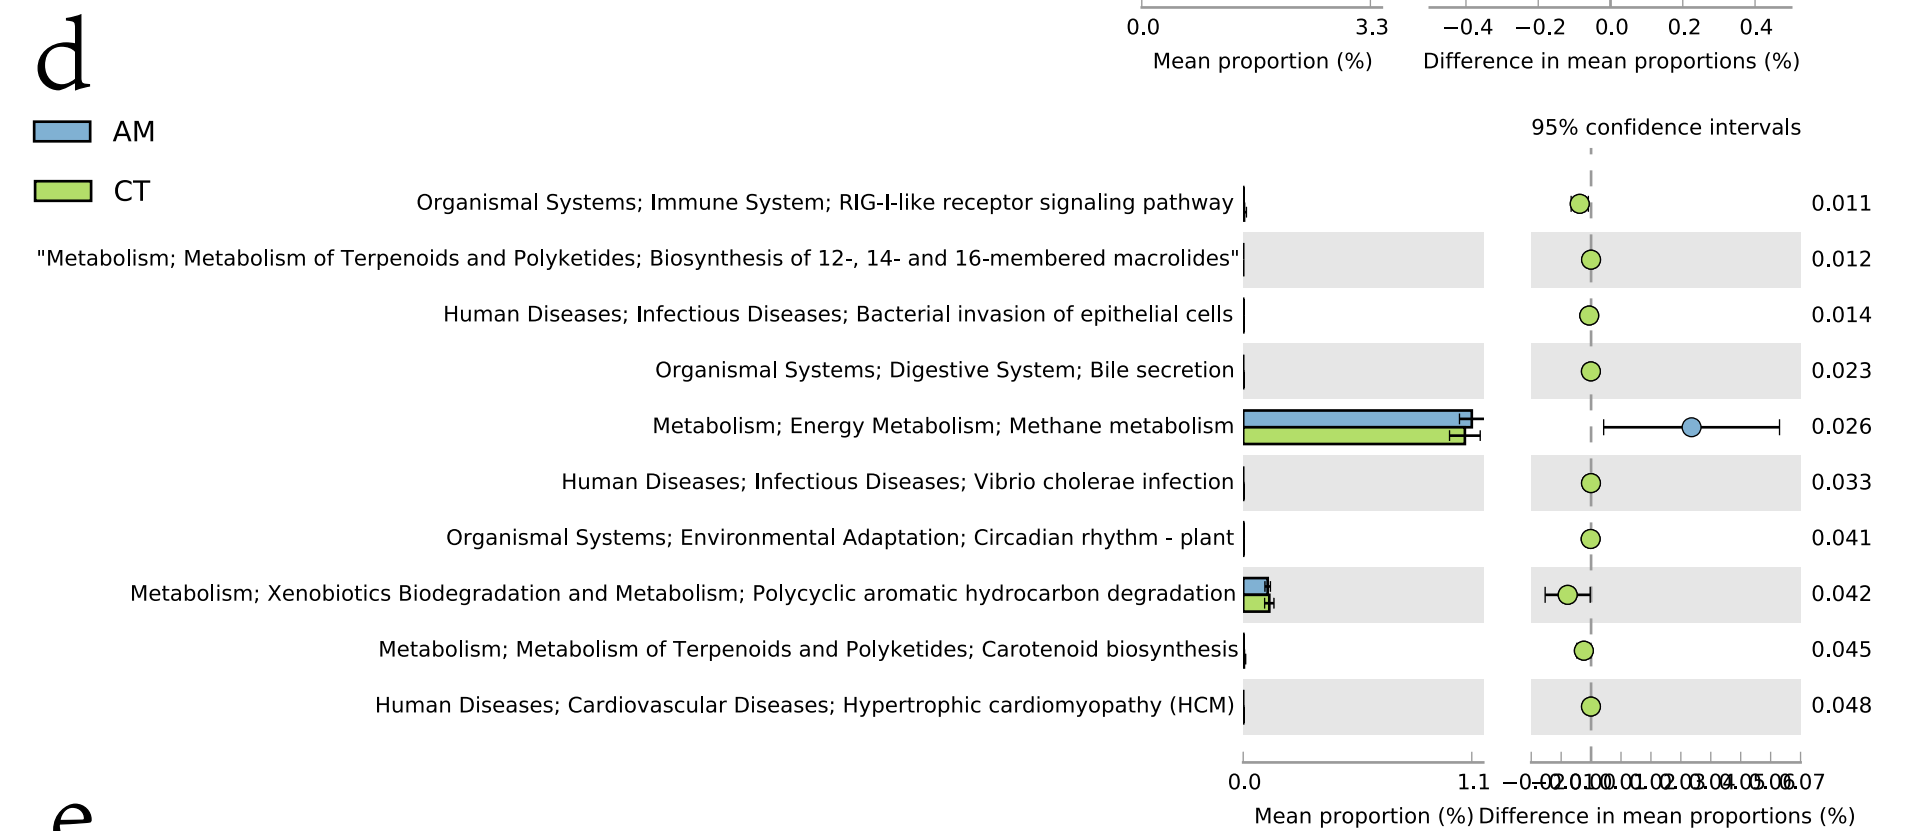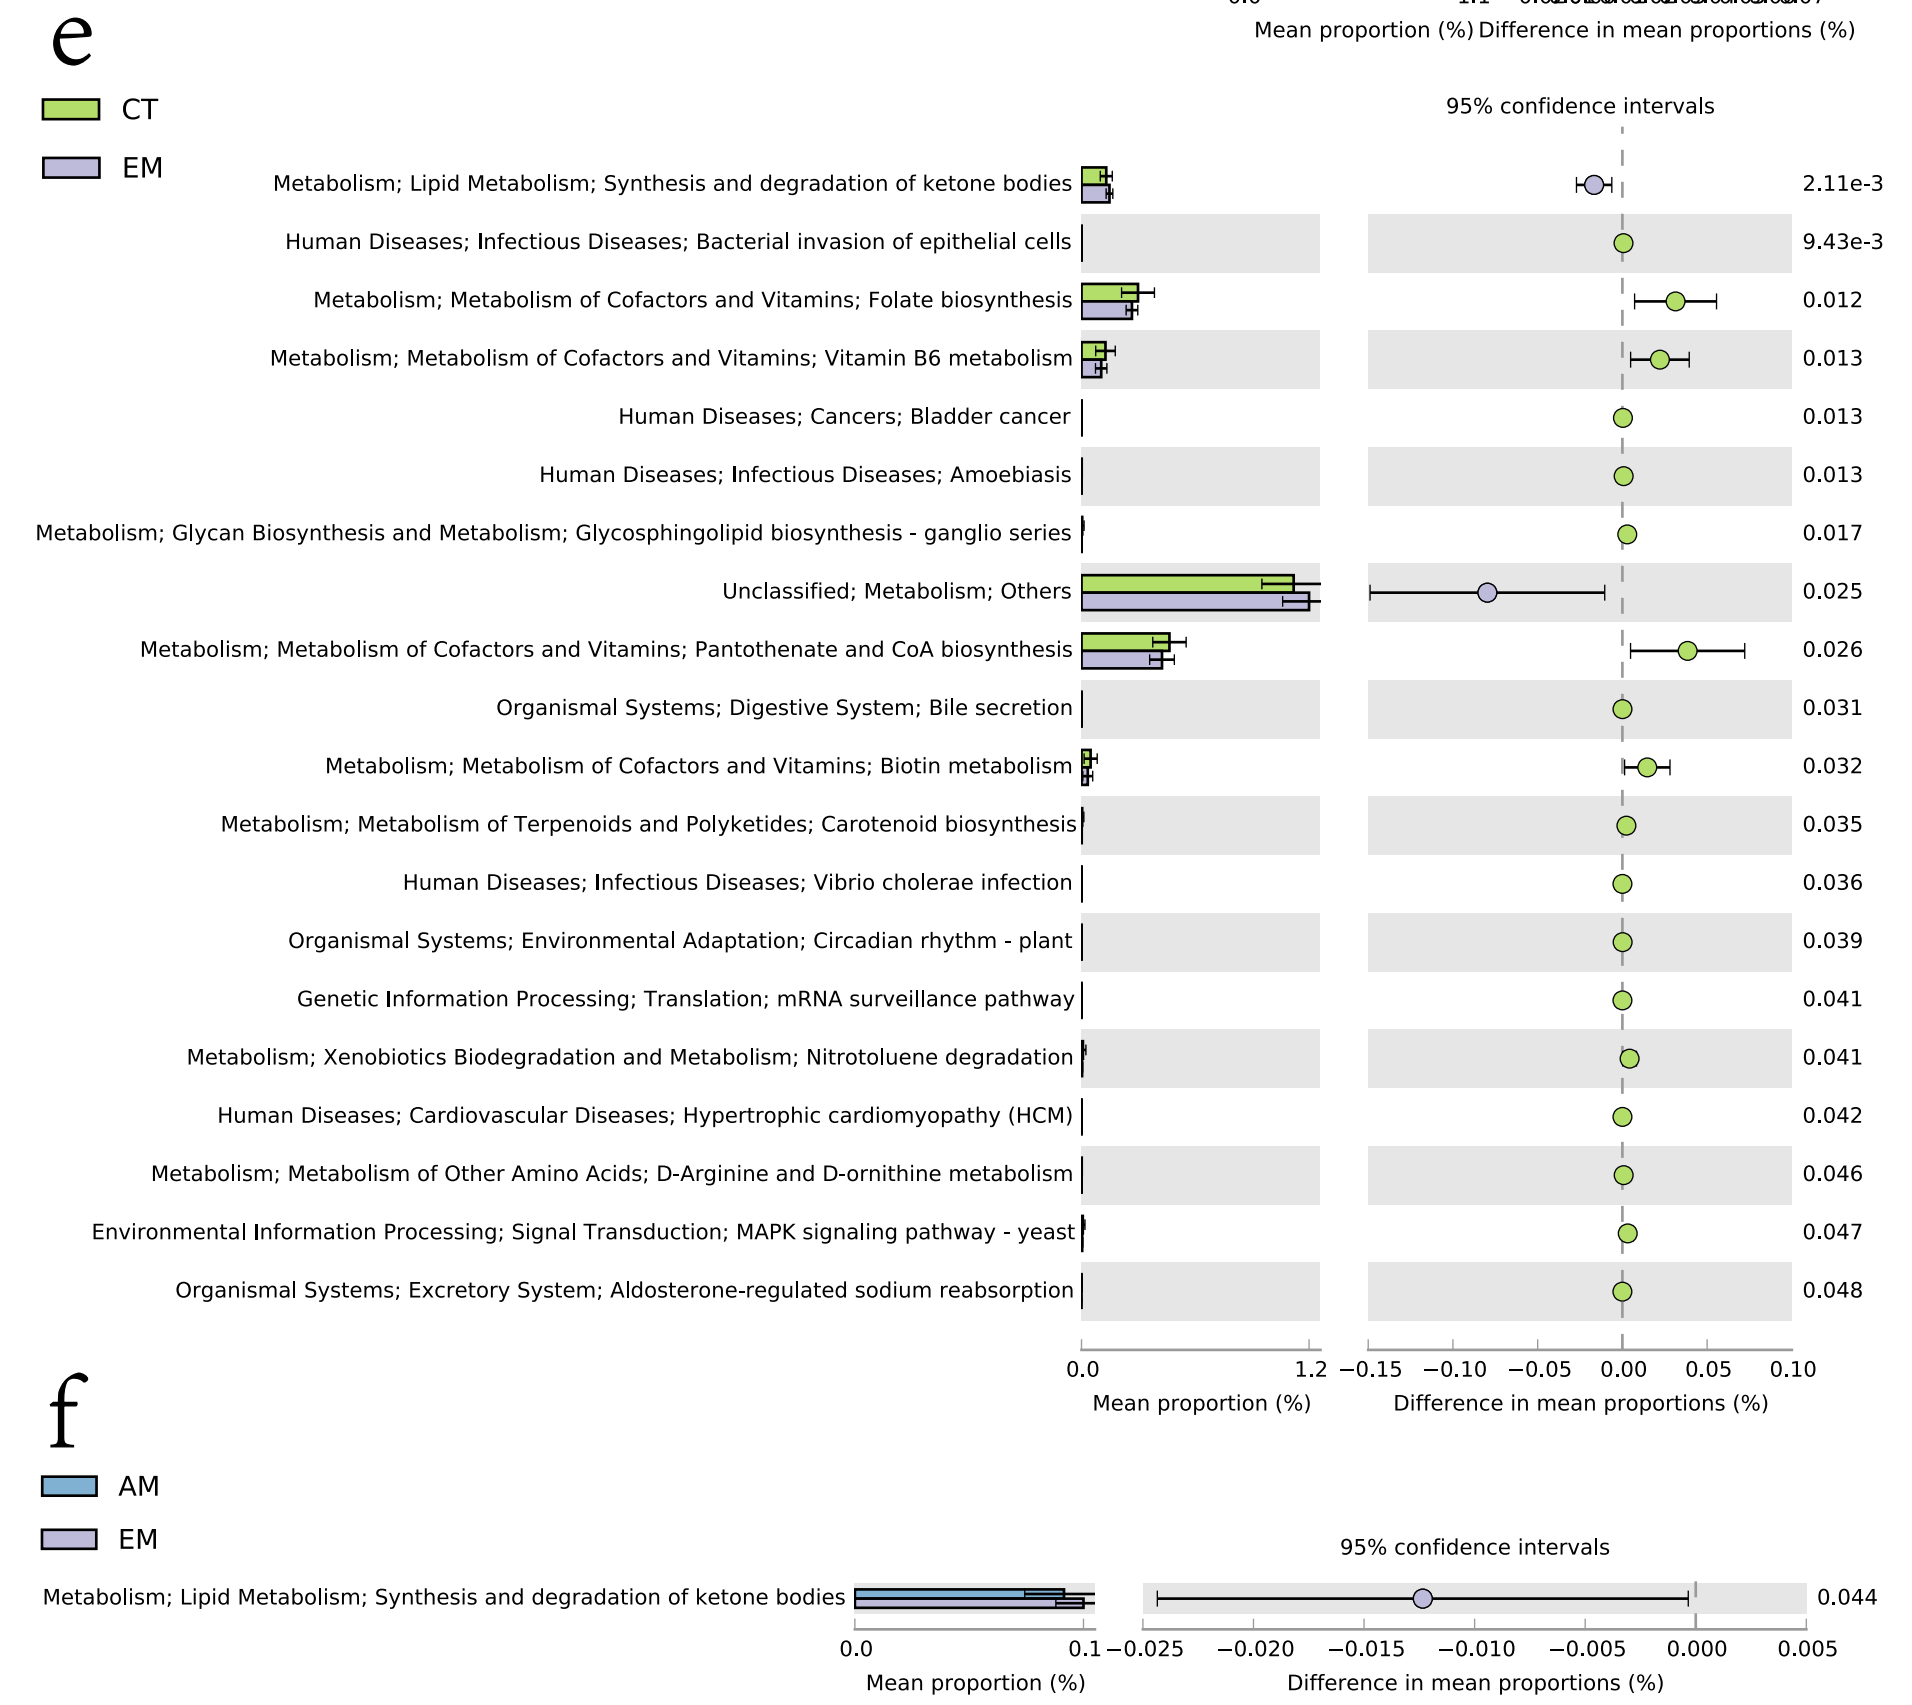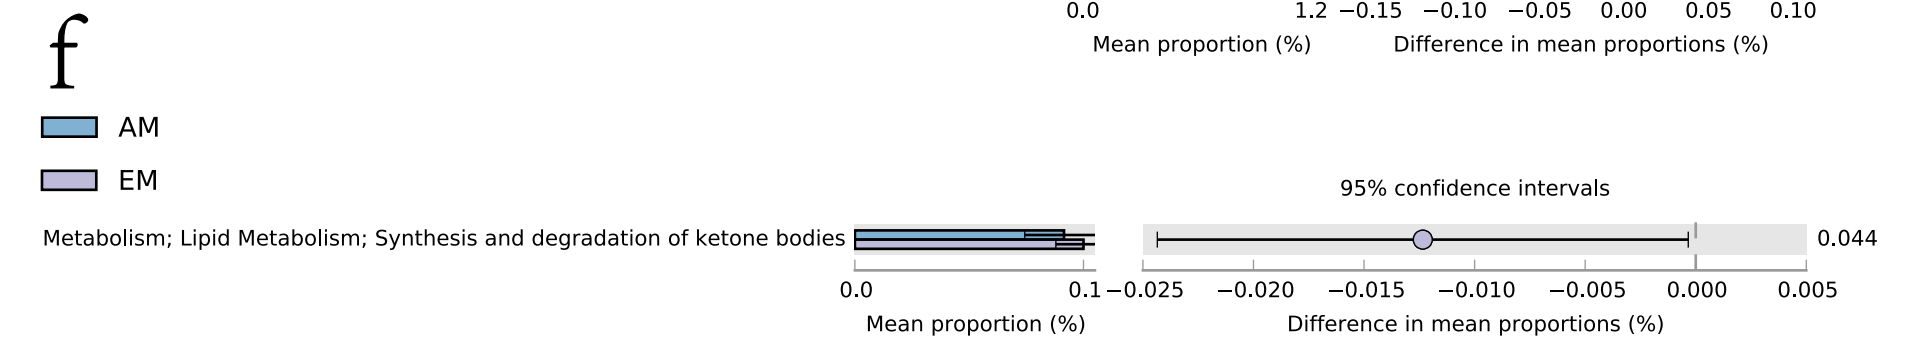

Supplement: Supplementary file 4 [file supplementary]
